# Supplementary material for: Tetracera loureiri Extract Regulates Lipopolysaccharide-Induced Inflammatory Response Via Nuclear Factor-κB and Mitogen Activated Protein Kinase Signaling Pathways
Source: MDPI journal article supplement (doi:10.3390/plants11030284), 2022-01-21

***Tetracera loureiri* extract regulates lipopolysaccharide-induced inflammatory response via nuclear factor- $\kappa$ B and mitogen activated protein kinase signaling pathway**

Jung A Lee<sup>1, †</sup>, Ju Young Shin<sup>2, †</sup>, Seong Su Hong<sup>1</sup>, Young-Rak Cho<sup>1</sup>, Ju-Hyoung Park<sup>2</sup>, Dong-Wan Seo<sup>2</sup>, Joa Sub Oh<sup>2</sup>, Jae-Shin Kang<sup>3</sup>, Jae Ho Lee<sup>3</sup> and Eun-Kyung Ahn<sup>1,\*</sup>

<sup>1</sup>*Bio-Center, Gyeonggido Business & Science Accelerator (GBSA), Suwon 16229, Republic of Korea.*

<sup>2</sup>*College of Pharmacy, Dankook University, Cheonan 31116, Republic of Korea.*

<sup>3</sup>*Biological Genetic Resources Utilization Division, National Institute of Biological Resources, Incheon 22689, Republic of Korea.*

## SUPPORTING INFORMATION

| List of Supporting Information                                       | Page |
|----------------------------------------------------------------------|------|
| <b>Figure S1.</b> The $^1\text{H}$ NMR spectrum of <b>1</b> .....    |      |
| S                                                                    | 3    |
| <b>Figure S2.</b> The $^{13}\text{C}$ NMR spectrum of <b>1</b> ..... |      |
| S                                                                    | 3    |
| <b>Figure S3.</b> ESI-MS spectrum of <b>1</b> .....                  |      |
| S                                                                    | 4    |
| <b>Figure S4.</b> The $^1\text{H}$ NMR spectrum of <b>2</b> .....    |      |
| S                                                                    | 5    |
| <b>Figure S5.</b> The $^{13}\text{C}$ NMR spectrum of <b>2</b> ..... |      |
| S                                                                    | 5    |
| <b>Figure S6.</b> ESI-MS spectrum of <b>2</b> .....                  |      |
| S                                                                    | 6    |

Figure S1.

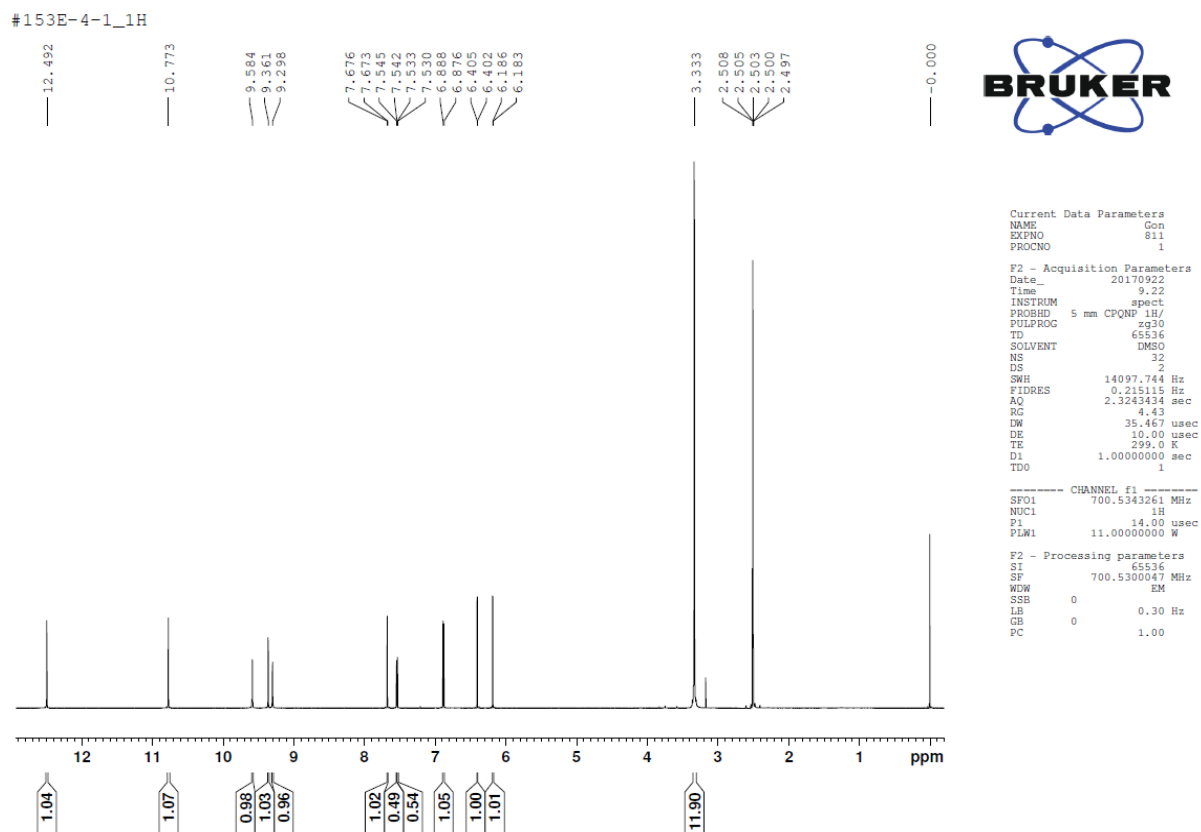

Figure S2.

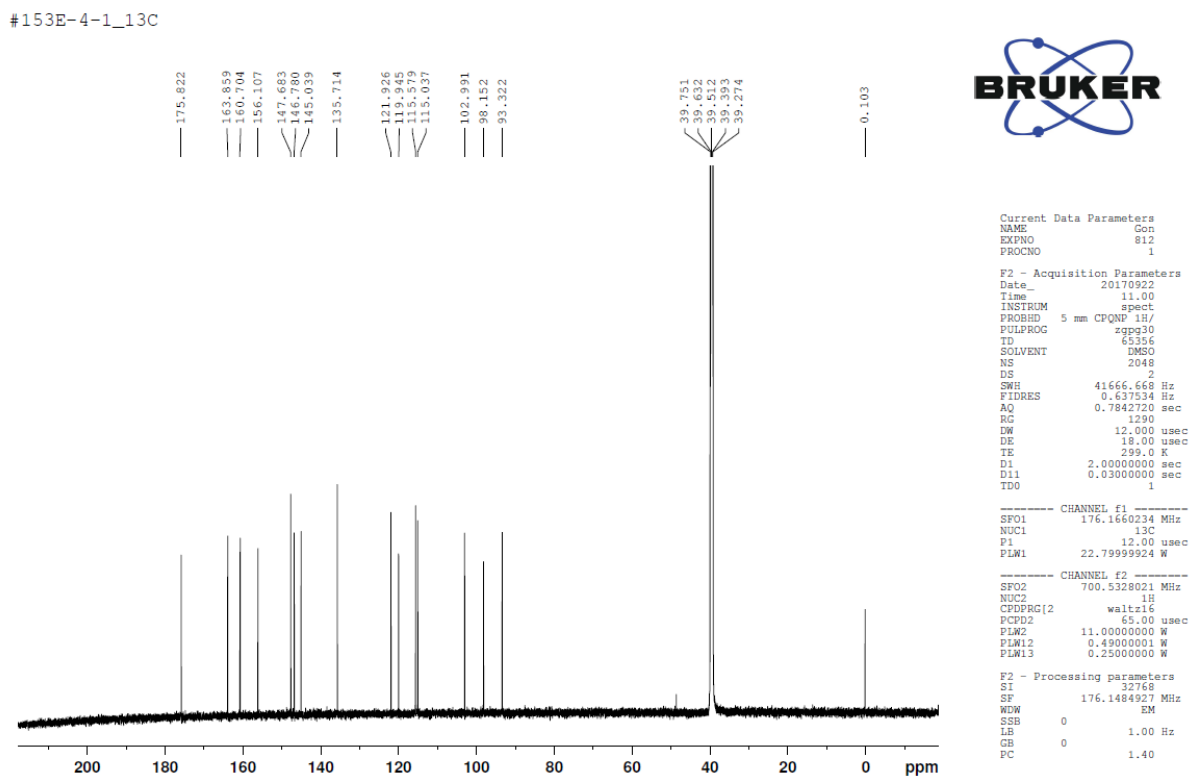

Figure S3.

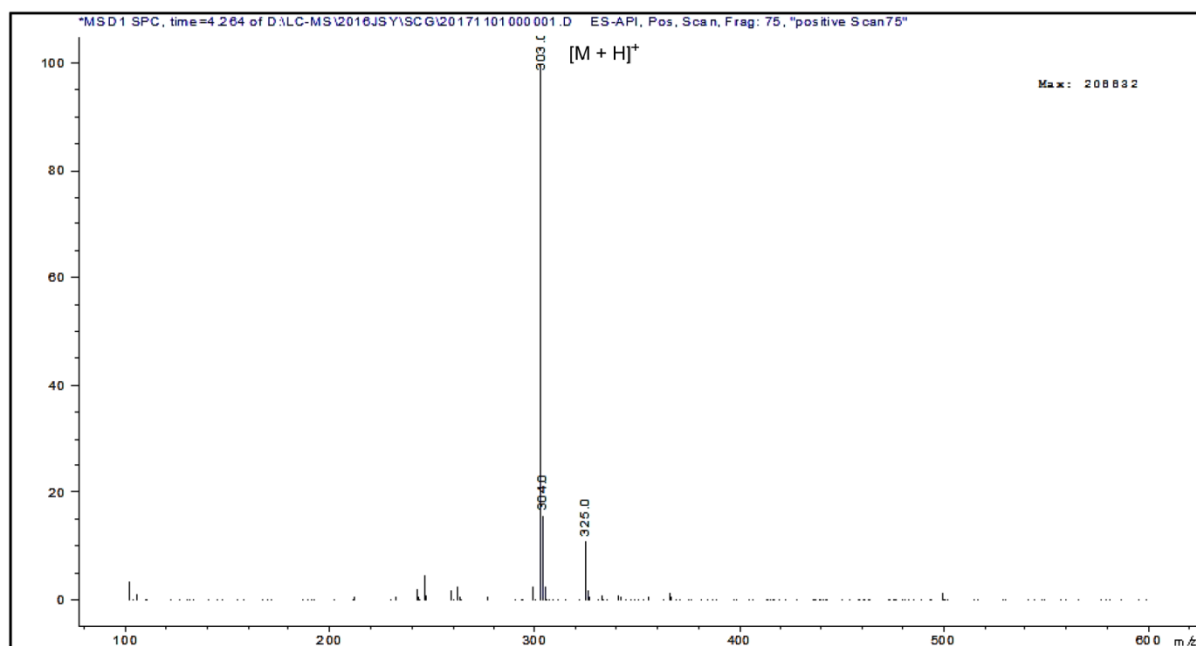

Figure S4.

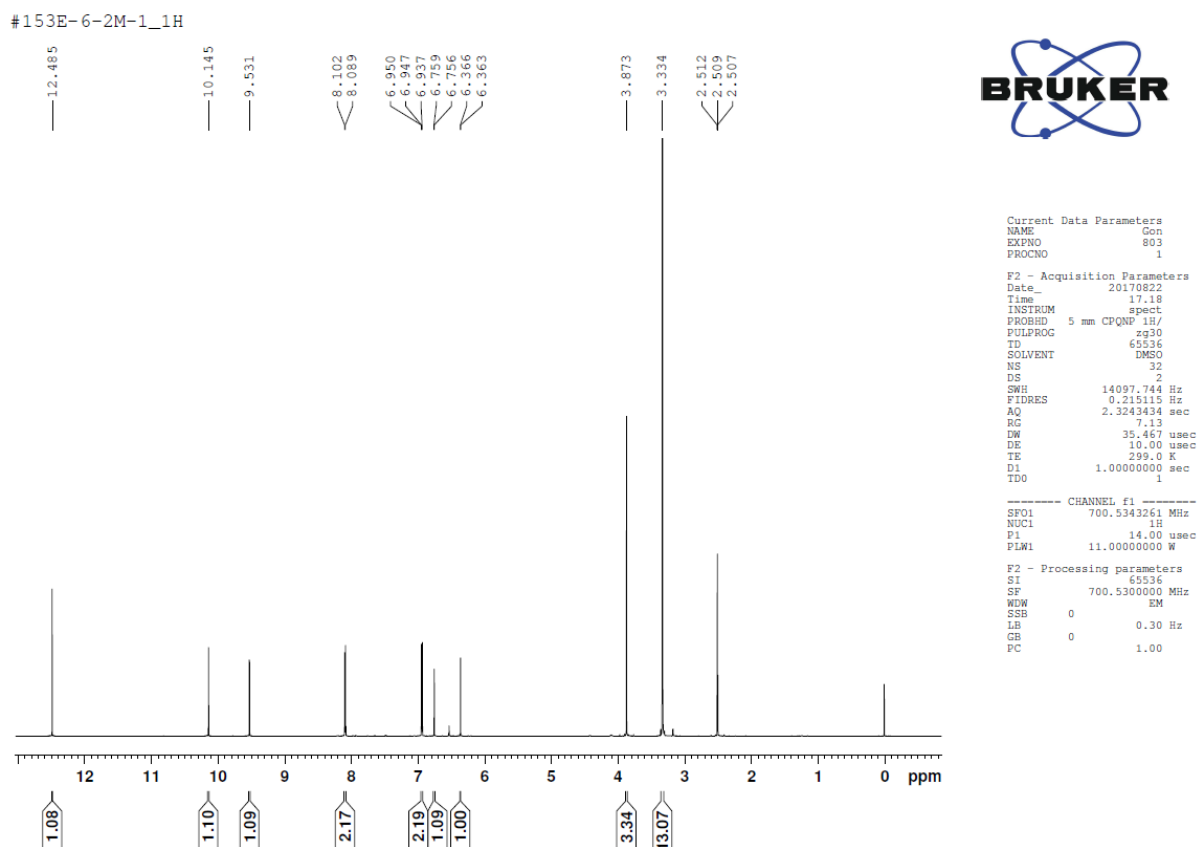

Figure S5.

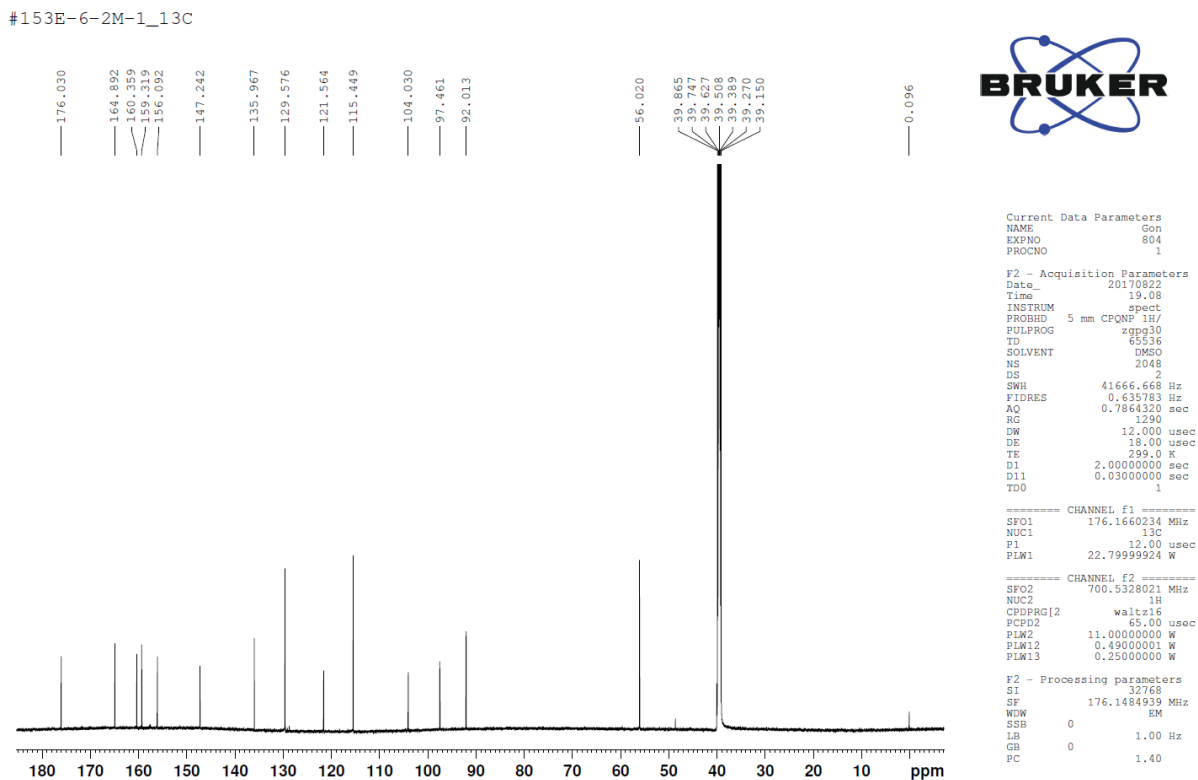

Figure S6.

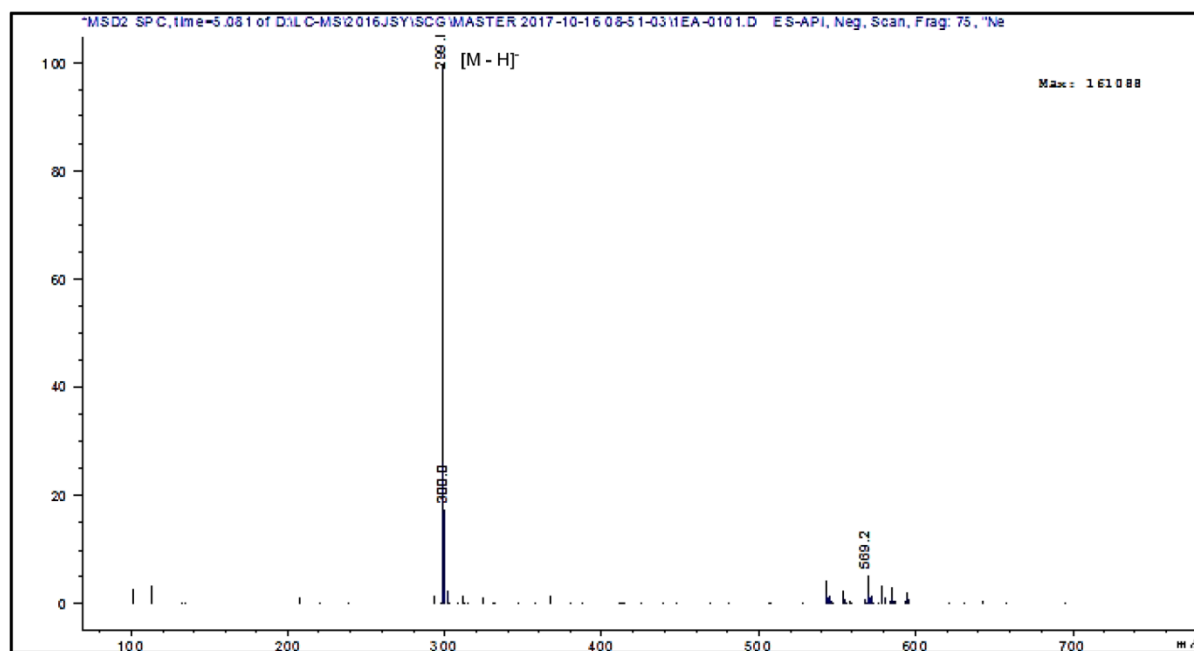

Supplement: s1 [file s1]
